1 Disproportional distribution of radioactive elements in the marine ecosystems surrounding  
2 the accident site of the Fukushima Daiichi Nuclear Power Plant  
3  
4 Shigeharu Moriya<sup>1, 3, \*</sup>, Hideaki Otsu<sup>2</sup>, Kumiko Kihara<sup>1, 4</sup>, Yukari Kato<sup>1</sup>, Misao Itouga<sup>1</sup>, Kenji  
5 Sakata<sup>1</sup>, Jun Kikuchi<sup>1, 3</sup>, Hiroshi Yamakawa<sup>5, 6</sup> and Jiro Suga<sup>6</sup>  
6  
7 1) RIKEN Center for Sustainable Resource Science, 1-7-22 Suehiro-cho, Tsurumi-ku,  
8 Yokohama city, Kanagawa, 230-0045, JAPAN  
9 Shigeharu Moriya, Kumiko Kihara, Yukari Kato, Misao Itouga, Kenji Sakata and Jun  
10 Kikuchi  
11 2) RIKEN Nishina Center for Accelerator-Based Science, 2-1 Hirosamwa, Wako city,  
12 Saitama, 351-0198, JAPAN  
13 Hideaki Otsu  
14 3) Graduate School of Medical Life Science, Yokohama-city University, 1-7-29 Suehiro-cho,  
15 Tsurumi-ku, Yokohama city, Kanagawa, 230-0045, JAPAN  
16 Shigeharu Moriya and Jun Kikuchi

17 4) Department of Biological and Chemical Systems Engineering, National Institute of  
18 Technology, Kumamoto College, 2627 Hirayama-Shinmachi, Yatsushiro-shi, Kumamoto  
19 866-8501, JAPAN  
20 Kumiko Kihara  
21 5) Tokyo University of Marine Science and Technology, 4-5-7 Konan, Minato-ku, Tokyo,  
22 108-8477, JAPAN  
23 Hiroshi Yamakawa  
24 6) Japan Academy of Underwater Sciences, 3-9-1-301 Botan, Koto-ku, Tokyo, 135-0046,  
25 JAPAN  
26 Hiroshi Yamakawa and Jiro Suga  
27  
28 \*) Corresponding author: Shigeharu Moriya  
29 RIKEN Center for Sustainable Resource Science, 1-7-22 Suehiro-cho, Tsurumi-ku,  
30 Yokohama city, Kanagawa, 230-0045, JAPAN  
31 Tel +81-45-508-7221, Fax +81-45-508-7363  
32 [smoriya@riken.jp](mailto:smoriya@riken.jp)

## 33 Abstract

## 34 Background

35 After the Fukushima Daiichi Nuclear Power Plant accident, various surveys were performed  
36 to measure the extent of radioactive material contamination in the marine sediments,  
37 surface waters, plankton and fish. Six months after the event, relatively high radiocesium  
38 contamination could still be detected in the fish and sediment of the coastal demersal  
39 environment. To determine the distribution of radioactive material in the demersal  
40 ecosystem adjacent to the event, we sampled and analyzed the dominant macroorganisms  
41 attached to the seafloor as well as environmental material, including biofilms, from the  
42 coastal demersal environment around Hisanohama Port, which is less than 30 km south of  
43 the accident site.

44

## 45 Results

46 Our results showed that variable ratios of radiosilver/radiocesium occurred in the  
47 macrobenthos, macroalgae and sediment samples. However, the biofilm samples displayed  
48 high radiocesium contamination but did not show radiosilver contamination.

49

50 Conclusions

51 These findings suggest that several different entry paths are available for radioactive  
 52 elements to access the biological components of the ecosystem, and these paths may explain  
 53 the disproportional and patchy distribution of radioactive elements among marine  
 54 ecosystems.

55

56 Keywords

57 Radio isotope, Marine eco-system, Biofilm

58

59 Background

60 Following the Great East Japan Earthquake and catastrophic tsunami in March of 2011,  
 61 the Fukushima Daiichi Nuclear Power Plant (FDNPP) accident led to the release of large  
 62 amounts of radioactive materials into the atmosphere and marine environment.

63 This environmental input of radioactive elements from the FDNPP introduced into the  
 64 marine waters a variety of radioisotopes, especially radiocesium isotopes. Public monitoring

showed that during the several months after the first explosion at the FDNPP, a rapid decrease in radioisotopes was observed in the nearby seawater. A joint official survey team from the Tokyo Power Electric Company (TEPCO), Fukushima prefectural government and the Japanese Ministry of Education, Culture, Sports, Science and Technology (MEXT) reported that the  $^{137}\text{Cs}$  contamination level in the seawater quickly decreased from over 10 k Bq/liter to less than 100 Bq/liter within a 2-month period, whereas the  $^{137}\text{Cs}$  found in the ocean sediments was continuously observed over this period at levels between 100 Bq/dry kg and 1000 Bq/dry kg until at least September 2012 [1]. This disproportional distribution of radioisotopes was also observed in marine fish by Wada et al. Wada reported that the retention time of radiocesium appears to be remarkably longer in the larvae of demersal fish, e.g., *Sebastes cheni*, than in surface fish, e.g., *Eugraulis japonica* [2]. Similar disproportional distributions among radionuclides was also reported in a terrestrial ecosystem. Nakanishi et al. reported  $^{110\text{m}}\text{Ag}$  accumulation in the orb-web spider (*Nephila clavata*) and other arthropods [3]. Decay-corrected data from Nakanishi's work showed that the radioactivity ratio between  $^{110\text{m}}\text{Ag}$  and  $^{137}\text{Cs}$  ( $^{110\text{m}}\text{Ag}/^{137}\text{Cs}$ ) in specific samples of arthropods was over 1.0, whereas the same ratio ( $^{110\text{m}}\text{Ag}/^{137}\text{Cs}$ ) in the soil was 0.0014-0.0023, which indicates that

these organisms may actively accumulate radiosilver more than radiocesium. This finding is inconsistent with the majority of the organisms from land ecosystems, which accumulate more radiocesium than radiosilver.

These disproportional distributions may occur via partitioning in complex ecosystems and food webs through processes that include biological concentration. To better understand the fate of radioisotopes in nearshore marine environments, the present study sampled water, sediment, biofilms, macrobenthos and macroalgae as basic environmental materials and entry points of organic/inorganic materials into the ecosystem. In the present study, samples were collected using a self-contained underwater breathing apparatus (SCUBA) at a depth of 5-10 m along the nearshore area around Hisanohama Port. Sampling was essentially performed weekly from the end of November 2011 to the beginning of February 2012 at 6 different points. Our results showed that macroalgae and macrobenthos accumulate and retain both radiocesium and radiosilver. The observed ratios of radiosilver/radiocesium are variable among the organisms, and they may be dependent on the specific usage and behavior of the organisms with respect to metals, such as specific cofactors, oxygen acceptors, metal uptake and other metabolic features. Although sediment

also retains both radiocesium and radiosilver, biofilms contain only radiocesium. The microbial community structure is likely related to the radiocesium accumulation and retention in microbes.

## Materials and Methods

### Sampling

Sampling was performed from 11 November 2011 to 4 February 2012. The sampling site was the ocean along the coastline of Hisanohama, Iwaki City, Fukushima, Japan. We collected samples 10 times within the established time period at 11 Nov (week 1), 20 Nov (week 2), 26 Nov (week 3), 3 Dec (week 4), 10 Dec (week 5), 17 Dec (week 6), 14 Jan (week 7), 21 Jan (week 8), 29 Jan (week 9) and 4 Feb (week 10). Sampling was performed at 6 different areas near Hisanohama Port: Area 1 (37.153762N 141.006167E, weeks 1 and 5), Area 2 (approximately 37.149863N 141.001017E, weeks 2, 8 and 9), Area 3 (approximately 37.146579N 141.002390E, week 4), Area 3' (approximately 37.147503N 141.008570E, week 10), Area 4 (approximately 37.133887N 141.002390E, weeks 3 and 7) and Area 4' (approximately 37.142953N 141.003592E, week 6). These sampling sites are located 30 km

113 south of the Fukushima Nuclear Power Plant #1. Sampling was performed by diving with a  
 114 SCUBA unit. Divers sampled the bottom water and surface water (5 L) and collected bottom  
 115 stones to obtain biofilms and locally observed macrobenthos and macroalgae.

116 Sediment core samples were collected at Area 2 using a piston corer prototype. The “core  
 117 sampler” was composed of a 4.5 cm diameter/28 cm height cylinder and inscribed piston.

118 Core samples were collected during a separate dive in weeks 6 (core sample 1) and 7 (core  
 119 samples 2 – 4).

120 Samplings were performed with permission from Fukushima Prefecture and the fishery  
 121 association of Iwaki City.

122

123 Sample preparation

124 The seawater samples were immediately filtered with two 24-mm-wide 0.22 µm Durapore  
 125 filters (Millipore, MA, USA) sample until they clogged. All samples were frozen at -20°C in a  
 126 field freezer prior to transportation back to laboratory.

127 In the laboratory, the samples were dried at 105°C overnight except for the filters, water  
 128 and sediment core samples. The dried samples were crushed by a food mill and settled into a



129 U8 container, and the weight and height were measured in the container. In the case of  
130 biofilms, half of the samples was dried as mentioned above and the other half was captured  
131 on 0.2  $\mu\text{m}$  pore size membrane filters and stored at  $-20^{\circ}\text{C}$  for ribosomal RNA gene analysis.  
132 The water samples were dried by boiling. The remaining salts were settled into a U8  
133 container, and the weight and height were measured in the container.  
134 Sediment core samples for radioactivity measurements were stored at  $-80^{\circ}\text{C}$ . The cores were  
135 sliced by a clean saw at 5 cm intervals from the surface side of the sediment to the bottom  
136 side. Each piece of the core sample was freeze dried and then settled into a U8 container,  
137 and the weight and height measured in the container.  
138  
139 Measurement of radioactivity  
140 The gamma ray activity of the samples in the containers was measured by a Germanium  
141 (Ge) detector. The detector setup is identical to those described in [4]. The energy resolution  
142 of 2 keV full width at half maximum (FWHM) was achieved at 1332.5 keV gamma rays. The  
143 sample location and the detector were surrounded with 15 cm lead blocks to reduce the  
144 background radiation in the gamma ray spectroscopy. The detection efficiency of the gamma

rays was calibrated with an accuracy of 2 - 10% using a multiple gamma ray standard source, which ranged from 88 keV to 1836 keV. A calibrated  $^{134}\text{gCs}$  source was also used to correct for the coincidence summing for radioactivity determinations of  $^{134}\text{gCs}$ .

Every sample was contained in a U8 plastic container. The U8 container is a standard container in Japan that is used for measurements of absolute radioactivity with high accuracy by a Ge detector. The geometry of the container is cylindrical, with a diameter of 47 mm and height of 60 mm. The volume is approximately 100 mL. The efficiency calibration source is available within the container with a uniform density in the container.

Every sample was measured by the Ge detector for at least 8 hours to obtain sufficient statistics for each gamma ray peak. The relative geometry between the sample and the Ge detector was carefully reproduced by a guide apparatus at the sample location.

Gamma rays from  $^{134,137}\text{Cs}$  and  $^{110\text{m}}\text{Ag}$  were observed for the majority of the samples. The radioactivity levels for every isotope were determined from the yield of the gamma rays corrected by the detection efficiency of the Ge detector and a geometrical acceptance between the sample and the detector. The geometry difference in the height of the sample from the calibration source was simulated by several electromagnetic simulation codes,

161 including Geant4 [5,6] and EGS5 [7].

162 The radioactivity of the marine animals, macroalgae and biofilm samples were normalized

163 by weight, and the radioactivity of the water samples and sediment core samples were

164 normalized by volume.

165

166 Element analysis

167 To quantitatively analyze the content of 37 elements ( $^7\text{Li}$ ,  $^9\text{Be}$ ,  $^{23}\text{Na}$ ,  $^{24}\text{Mg}$ ,  $^{27}\text{Al}$ ,  $^{39}\text{K}$ ,  $^{43}\text{Ca}$ ,

168  $^{45}\text{Sc}$ ,  $^{47}\text{Ti}$ ,  $^{51}\text{V}$ ,  $^{52}\text{Cr}$ ,  $^{55}\text{Mn}$ ,  $^{57}\text{Fe}$ ,  $^{59}\text{Co}$ ,  $^{60}\text{Ni}$ ,  $^{63}\text{Cu}$ ,  $^{66}\text{Zn}$ ,  $^{85}\text{Rb}$ ,  $^{88}\text{Sr}$ ,  $^{98}\text{Mo}$ ,  $^{111}\text{Cd}$ ,  $^{133}\text{Cs}$ ,  $^{139}\text{La}$ ,  $^{140}\text{Ce}$ ,

169  $^{141}\text{Pr}$ ,  $^{146}\text{Nd}$ ,  $^{152}\text{Sm}$ ,  $^{153}\text{Eu}$ ,  $^{158}\text{Gd}$ ,  $^{159}\text{Tb}$ ,  $^{164}\text{Dy}$ ,  $^{165}\text{Ho}$ ,  $^{166}\text{Er}$ ,  $^{169}\text{Tm}$ ,  $^{172}\text{Yb}$ ,  $^{175}\text{Lu}$ , and  $^{202}\text{Hg}$ ) in

170 the samples (i.e., surface salts, surface microbes, biofilms), the samples were predigested

171 with 5 mL of concentrated  $\text{HNO}_3$  for 1 h at room temperature. Next, the organic components

172 were completely decomposed by wet-ashing using a microwave sample preparation system

173 (Multi-Wave-3000, Perkin Elmer, MA USA) [8]. The digested samples were brought up to a

174 volume of 50 mL with MilliQ water (MQW) and filtered through 5B filter paper (Advantec,

175 Tokyo, Japan). The concentrations of the mineral elements were determined by Inductively

176 Coupled Plasma Mass Spectrometry (ICP-MS, NexION300, Perkin Elmer). For the ICP-MS

analysis, a portion of the filtrated samples was diluted appropriately with 0.01 mol L<sup>-1</sup> HCl

[8]. The mineral nutrient concentration in the samples was calculated as a unit (mg g<sup>-1</sup> in

dry weight).

The obtained ICP-MS data were normalized by the root-sum-of-squares (RSS) levels among

each element. Count data of radioactive cesium (<sup>134</sup>Cs and <sup>137</sup>Cs) were treated with the same

calculation for normalization and then merged with the normalized ICP-MS dataset

(elements table).

ssrDNA analysis

Genomic DNA was prepared from stored biofilm samples by bead-beating with a

phenol:chloroform:isoamyl alcohol (PCI) extraction. Bead-beating was performed at 3000

rpm for 5 min (TOMY, Tokyo Japan), and then nucleic acids were recovered by ethanol

precipitation.

PCR amplification was performed with the extracted genomic DNA with two primer sets for

16S ssrDNA, 515F/806R [9,10], and 18S ssrDNA, TAReuk454FWD1/TAReukREV3 [11]. The

primers were modified for Illumina sequencing with a multi-index kit for the Nextera XT

sequencing library construction kit (Illumina, CA, USA). We added a “read1” sequence (5’-TCG TCG GCA GCG TCA GAT GTG TAT AAG AGA CAG -3’) to the forward primers and a “read1” sequence (5’- GTC TCG TGG GCT CGG AGA TGT GTA TAA GAG ACA G -3’) to the reverse primers.

PCR was performed with a standard reaction of ExTaq DNA polymerase according to the manufacturer’s instructions (Takara Bio, Kyoto Japan) with 25 pmol of each primer/50 µl reaction. The reactions were performed as a two-step PCR (10 cycles of 94°C for 30 s, 55°C for 45 s and 72°C for 60 s followed by 20 cycles of 94°C for 30 s and 72°C for 60 s) for 16S and 3-step PCR (30 cycles of 94°C for 30 s, 55°C for 45 s and 72°C for 60 s) for 18S. The amplified products were purified by 1% agarose gel electrophoresis. The obtained amplified products were applied to the NexteraXT (Illumina CA USA) sequencing library construction process without the “tagmentation” process.

A multi-index sequencing library was applied to the MiSeq sequencing kit v1 and read by Illumina MiSeq according to the instructions in the paired-end sequencing mode. Data were treated by MiSeq reporter software, and the reads were obtained from individual samples. After the extraction of reads, reads from weeks 4, 5 and 8 for the 18S ssrDNA were

insufficient for analysis. Therefore, the following analysis was performed using reads from weeks 1, 2, 3, 6, 7, 9 and 10.

The obtained read data were mapped onto the ribosomal RNA sequence library SILVA release 108 by the program package QIIME [12] using “Prefix-suffix OTU picking”, and the absolute abundance OTU table at the family level was constructed. Count zero data were manually removed from the table, and the relative abundance values were calculated. 16S data and 18S data were treated independently and then merged into a single OTU table with the relative abundance values.

Sequence data have been deposited in the DDBJ sequence read archive with accession number DRA004367.

## Statistical analysis

For the statistical analysis, we used the program package R [13]. First, we drew a heatmap chart with the hierarchical cluster analysis (HCA). The heatmap.3 function in the GMD package, which is a package for non-parametric distance measurements between two discrete frequency distributions [14], was used to draw the heatmap with the HCA.

Independent heatmaps were drawn from each element table and the OTU table with a two-axis HCA. A scaling option was used for the OTU table treatment according to the row direction but was not used for the elements table treatment.

A principal components analysis (PCA) was performed with the merged dataset, including both the out table and elements table, using the prcomp function in R. Score plots were drawn with principal component 1 (PC1) (x-axis) and PC2 (y-axis). The loading plots for quadrants II and III were manually drawn.

Spearman's rank correlation coefficient between the elements dataset and the OTUs dataset was calculated with the cor function in R. A correlation matrix was used to draw the heatmap chart with the HCA using the heatmap.3 function of R.

## Results and Discussion

Heterogeneous distribution of artificial radioisotopes in the coastal marine environment around Hisanohama

According to our gamma ray energy spectra, we found significant peaks corresponding to  $^{134}\text{Cs}$  and  $^{137}\text{Cs}$  in addition to natural radioisotope signals, such as  $^{40}\text{K}$  (data not shown), for

all samples with the exception of the seawater samples. We also detected significant  $^{110m}\text{Ag}$  signals from the macrobenthos, macroalgae and sediment samples. Significant signals of the radioisotopes  $^{134}\text{Cs}$ ,  $^{137}\text{Cs}$  and  $^{110m}\text{Ag}$  were not detected from the control samples taken from Nishi-kawana inside Tokyo Bay, which is approximately 280 kilometers from the FDNPP. Although  $^{134}\text{Cs}$  (half-life of 2.0652 years) and  $^{137}\text{Cs}$  (half-life of 30.1 years) from prior nuclear weapons tests in the Pacific Ocean and the Chernobyl disaster might have persisted in the seabed around Japan, our analysis of samples collected near Nishi-kawana did not detect these signals. Therefore, we concluded that the radioisotopes detected in the samples in this study originated from the FDNPP disaster rather than the environmental background or past nuclear weapon tests.

As presented in Table 1, among the results from the radioactivity measurements of a variety of samples, we noticed a heterogeneous distribution between radiocesium ( $^{134}\text{Cs}$  and  $^{137}\text{Cs}$ ) and radiosilver ( $^{110m}\text{Ag}$ ). The retention of radiocesium was observed in all sediments, macrobenthos, macroalgae and biofilm samples, whereas non-detectable signals of these isotopes were observed in the surficial and bottom water. This result is surprising because



the  $^{134}\text{Cs}$  radioactivity detected in the Pacific Ocean near the accident site was 3900 Bq/m<sup>3</sup> (3.9 Bq/liter) in June 2011, which is one of the highest levels ever recorded [15]. Although our results do not directly indicate that marine organisms and sediments are able to accumulate radioisotopes at the concentrations found in this environment, we must consider that they are able to retain radioisotopes for at least up to 9 months, which represents the time lapse between the disaster and sample collection.

Table 1. Peak detection in the samples

| Material                     | Peak detection    |                   |                           |
|------------------------------|-------------------|-------------------|---------------------------|
|                              | $^{134}\text{Cs}$ | $^{137}\text{Cs}$ | $^{110\text{m}}\text{Ag}$ |
| Surface water                | —                 | —                 | —                         |
| Bottom water                 | —                 | —                 | —                         |
| Particles in surface water * | —                 | —                 | —                         |
| Particles in bottom water *  | —                 | —                 | —                         |
| Sediments                    | ++                | ++                | ++                        |
| Macrobenthos                 | ++                | ++                | +                         |

|                          |    |    |   |
|--------------------------|----|----|---|
| Macroalgae               | ++ | ++ | + |
| Biofilms on bottom rocks | ++ | ++ | – |

++: significant peak detected from all samples

+: significant peak detected from certain samples (not all samples)

–: significant peak not detected from any sample

\*: Particles were filtered from water using a 0.22 µm filter, and the radioactivity was measured

Sediment core samples were obtained from the sampling point “Area 2” by the core sampler. The analysis of these sediment core samples indicated the presence of both radiocesium and radiosilver. The measured radioactivities are shown in Additional file 1: Supplementary Table 1. To better understand the radioactivity in the same volume of space, we employ the unit Bq/liter to express the radioactivity of the core samples because the core samples contain different materials along their depth profile.

In Figure 1, the distribution of radioactivity along the sediment column is shown. Both radiocesium and radiosilver are distributed similarly in the surficial part of the core

samples, which contains a large amount of radioactivity. The calculated regression line for the data showed that both radiocesium and radiosilver occur at depths above approximately 155 mm. The similar distribution of radiocesium and radiosilver suggest that both radioisotopes start to precipitate at almost the same time and they share a similar precipitation pattern. The ratio of radioactivity between  $^{110m}\text{Ag}$  and  $^{137}\text{Cs}$  is 0.0046 on average, which is based on the detected radiosilver of each 5 cm slice of the core samples (Fig. 1b).

Figure 1

Radioactivity of the sliced sediment core. Panel a shows the results of  $^{134}\text{Cs}$ ,  $^{137}\text{Cs}$  and  $^{110m}\text{Ag}$  measurements. Open circles indicate each sliced core sample. All 4 core samples were collected inside Hisanohama Port (Area 2). Radioactivity is expressed as Bq/liter material. The regression lines are calculated as linear approximation lines, and the  $R^2$  value is indicated beside each line. Panel b shows the  $^{110m}\text{Ag}/^{137}\text{Cs}$  ratios. Panel a shows the individual  $^{110m}\text{Ag}/^{137}\text{Cs}$  ratio of each core slice.

In the macrobenthos and macroalgae samples, we also detected radiosilver and radiocesium.

However, the ratio between  $^{110m}\text{Ag}$  and  $^{137}\text{Cs}$  varied among the samples.

As shown in Figure 2a and Additional file 2: Supplementary Table 2, macroalgae contained

a relatively low ratio of radiosilver relative to radiocesium. The ratio between  $^{110m}\text{Ag}$  and

$^{137}\text{Cs}$  averaged 0.06 to 0.07 among brown, red and calcareous algae (Fig. 2a); nevertheless, it

varied among individuals (Fig. 2b). Except for green algae, the ratio of  $^{110m}\text{Ag}/^{137}\text{Cs}$  of

macroalgae was approximately 10-fold larger than that of the surrounding sediments. Green

algae contained almost no  $^{110m}\text{Ag}$ .

Figure 2

Radioactivity of  $^{134}\text{Cs}$ ,  $^{137}\text{Cs}$  and  $^{110m}\text{Ag}$  in the macroalgae samples. Panel a shows the

average  $^{110m}\text{Ag}/^{137}\text{Cs}$  ratio in the macroalgae sample, and panel b shows the individual

results for the macroalgae. The measured radioactivity is expressed by the bar graph.

Closed bars show  $^{134}\text{Cs}$ , open bars show  $^{137}\text{Cs}$  and gray bars show  $^{110m}\text{Ag}$ . Radioactivity is

expressed as Bq/kg of dried sample (Bq/kg dry biomass).

### Figure 3

Radioactivity of  $^{134}\text{Cs}$ ,  $^{137}\text{Cs}$  and  $^{110\text{m}}\text{Ag}$  in the macrobenthos samples. Panel a shows the average  $^{110\text{m}}\text{Ag}/^{137}\text{Cs}$  ratio in the macrobenthos sample, and panel b shows the individual results for the macrobenthos. The measured radioactivity is expressed by the bar graph. Closed bars represent  $^{134}\text{Cs}$ , open bars represent  $^{137}\text{Cs}$  and gray bars represent  $^{110\text{m}}\text{Ag}$ . Radioactivity is expressed as Bq/kg of the dry weight of the samples (Bq/kg dry biomass). The arrowhead indicates the relatively high concentration of radiosilver found in the sponge samples (i.e., the main body).

As shown in Figures 3a and 3b and Additional file 3: Supplementary Table 3, the macrobenthos samples showed a variable ratio between  $^{110\text{m}}\text{Ag}$  and  $^{137}\text{Cs}$ . Our results indicated that sea snails (Buccinidae) and oysters (*Crassostrea gigas*) consistently presented a high ratio of  $^{110\text{m}}\text{Ag}/^{134}\text{Cs}$ , which was also observed for the sponge *Cliona chilensis*. Samples of the Ascidian *Halocynthia roretzi* showed a relatively high ratio of  $^{110\text{m}}\text{Ag}/^{134}\text{Cs}$  (Fig. 3a).

Certain mollusks, such as sea snails and oysters, are known to use hemocyanin as an oxygen

carrier [16]. A study on the relatively high ratio of  $^{110m}\text{Ag}/^{137}\text{Cs}$  in the spider, *Atypus karschi* indicated that the reaction center Cu in hemocyanin can be replaced by Ag, or  $^{110m}\text{Ag}$  in this case [3]. Similarly, the sampled mollusks may have actively incorporated  $^{110m}\text{Ag}$  from environmental water and taken up the radioisotope into the blood system. To corroborate this hypothesis, our results showed a higher ratio of radiosilver compared with that of radiocesium detected in the body ( $^{134}\text{Cs} = 21.7923$ ,  $^{137}\text{Cs} = 37.3885$ ,  $^{110m}\text{Ag} = 134.6388$  (Bq/kg dry biomass)) than in the shell ( $^{134}\text{Cs} = 12.6245$ ,  $^{137}\text{Cs} = 18.8071$ ,  $^{110m}\text{Ag} = 17.7947$  (Bq/kg dry biomass)).

A similar mechanism for accumulation and retention of the relatively high observed amount of radiosilver in *Halocynthia roretzi* is expected. Ascidiaceans accumulate vanadium into their blood cells [17]. Although the function of vanadium accumulation is not yet fully understood and the mechanism of metal uptake in ascidiaceans is still under investigation, these organisms may accumulate other metals using vanadium binding protein(s). Our samples of ascidiaceans are from *Halocynthia roretzi*, and a high specificity for vanadium has not been reported in this species [18]. Our hypothesis is that a metal binding factor within the *Halocynthia roretzi* blood system with a low specificity for vanadium is able to promote

$^{110m}\text{Ag}$  accumulation. Although our hypothesis is based on indirect evidence, it is partially supported by the observation that the *Halocynthia roretzi* body (including the blood system) showed a larger amount of radiosilver than was found in the shell, which can contain radiosilver because of attached organisms on the surface of the shell. We investigated three individuals of *Halocynthia roretzi*, and the body measurement results are  $^{134}\text{Cs} = 645,0563$ ,  $927.5638$ ,  $944.2312$ ;  $^{137}\text{Cs} = 997.5926$ ,  $1437.1948$ ,  $1588.1469$ ;  $^{110m}\text{Ag} = 295.6794$ ,  $255.9421$ ,  $213.5846$  (Bq/kg dry biomass) and the shell measurement results are  $^{134}\text{Cs} = 18.6579$ ,  $51.1889$ ,  $28.2958$ ;  $^{137}\text{Cs} = 30.3881$ ,  $80.5451$ ,  $43.8699$ ;  $^{110m}\text{Ag} =$  not detected,  $3.3797$ , not detected (Bq/kg dry biomass).

The sea urchin (*Anthocidaris crassispina*) samples and the majority of the sponge samples (*Cliona chilensis*) presented ratios of radiosilver/radiocesium that were lower relative to that of the other macrobenthos (Fig. 3a, b). Nevertheless, the feeding pattern of sea urchins and sea snails are similar because they are both deposit feeders, and the feeding patterns of sponges, oysters and Ascidians are also similar because they are all filter feeders. Interestingly, 4 of the 16 specimens of sponge presented remarkably high radiosilver/radiocesium ratios of approximately 0.5 (Fig. 3b, arrowheads). Variation were

not observed in the radiosilver/radiocesium ratio corresponding to the three color variations of the samples of *Cliona chilensis*. A previous report showed that certain sponge species exhibit a strong ability to incorporate a variety of metal elements, including silver [19]. Indeed, sponges are known as "a sentinel organism" that can be used as a marker to monitor heavy metal pollution in water because they present a high capacity for specific metal accumulation [20]. According to Genta-Jouve et al., *Acanthella acuta*, which is a species of commonly found sponge, can incorporate  $^{110m}\text{Ag}$  from the surrounding water and retain the element even after moving to clean water that does not contain  $^{110m}\text{Ag}$  [19]; however, among the six sponge species analyzed in that study, this feature was only observed in *Acanthella acuta*. In our study, four specimens of sponge incorporated relatively high ratios of radiosilver relative to radiocesium (Fig. 3b arrowhead); therefore, we regarded these sponges as a "silver accumulator" species.

Thus, macroalgae and macrobenthic species present varying capacities to incorporate and retain radioisotopes based on their biological features. In addition, the radiosilver/radiocesium ratios of these organisms are higher than those in the sediment.

Although we detected both radiocesium and radiosilver from almost all biological samples in



this research, an interesting exception was observed because radiosilver was not detected in any of the biofilm samples, including biofilms collected from Area 2 (weeks 2, 8 and 9) (Table 2). This result suggested that microbes that compose biofilms specifically accumulate and retain radiocesium but not radiosilver, even when the surface of nearby sediments contains both radioisotopes.

Table 2. Radioactivity of the biofilm samples

|       |        | <sup>134</sup> Cs Bq/kg dry | <sup>137</sup> Cs Bq/kg dry | <sup>110m</sup> Ag Bq/kg dry |
|-------|--------|-----------------------------|-----------------------------|------------------------------|
| Week1 | Area1  | 1141.77                     | 1655.17                     | nd                           |
| Week2 | Area2  | 671.00                      | 932.18                      | nd                           |
| Week3 | Area4  | 306.90                      | 429.21                      | nd                           |
| Week4 | Area3  | 429.21                      | 2353.58                     | nd                           |
| Week5 | Area1  | 926.40                      | 1436.73                     | nd                           |
| Week6 | Area4' | 538.56                      | 829.08                      | nd                           |
| Week7 | Area4  | 844.49                      | 1543.05                     | nd                           |
| Week8 | Area2  | 818.66                      | 1607.65                     | nd                           |

|        |        |        |        |    |
|--------|--------|--------|--------|----|
| Week9  | Area2  | 359.77 | 591.46 | nd |
| Week10 | Area3' | 190.29 | 294.20 | nd |

nd: not detected

“Cesium-philic” biofilm

Microbial communities that grow on surfaces of solid materials in the presence of water are known as biofilms. Our observations suggest that the biofilm community specifically accumulates radiocesium. Therefore, we analyzed the relationship between the microbial consortia within the biofilms and their elemental composition.

Quantified element data were combined with radioactivity data for radiocesium and utilized for the statistical analysis. Ribosomal RNA genes were sequenced and used to construct a dataset for the statistical analysis.

A HCA from the dataset of elements and radiocesium (Fig. 4) in which an accumulation of radioactive cesium, Cr, Ni, Sc, Rb, Li and cesium (Cs cluster) was performed for the week 1 sample. Another remarkable profile from the elemental analysis is observed in week 3, where high relative amounts of lanthanide elements were measured (Lanth cluster).

396

397 Figure 4

398 Heatmap chart of the element and radioactivity data from the biofilm samples based on the  
399 hierarchical clustering analysis (HCA). The heatmap chart was sorted by the HCA for both  
400 axes (elements axis and sample axis). Boxes indicate clusters of radiocesium (Cs cluster) or  
401 lanthanides (Lanth cluster).

402

403 A PCA score plot (Fig. 5a) of the merged dataset between the elements/radiocesium and the  
404 microbial consortia showed that the week 1 sample was placed in the PC1 negative – PC2  
405 positive direction and the week 3 sample was placed in the PC1 negative – PC2 negative  
406 direction. As mentioned above, the week 1 sample contained high relative amounts of the Cs  
407 cluster signals, and the week 3 sample contained high relative amounts of the Lanth cluster  
408 signals. Consistent with those findings, the PCA loading plot showed that the Cs cluster was  
409 placed in the PC1 negative – PC2 positive direction (Fig. 5b, Additional file 4:  
410 Supplementary Table 4), and the lanthanide cluster was placed in the PC1 negative – PC2  
411 negative direction (Fig. 5b, Additional file 5: Supplementary Table 5). The results of the

HCA and PCA analyses suggested that a “cesium-philic” biofilm occurred at the sampling point in week 1 and a “lanthanide-philic” biofilm occurred at the sampling point in week 3.

Figure 5

PCA results among the sampling sites with microbial consortia data and element data with radiocesium. Panel a is the score plot of the PCA among sampling sites. Each colored dot indicates each sampling site. The color code is superimposed on the PCA score plot. Panel b indicates the loading plot of the elements data. The upper panel shows the plot of elements that contribute to the PC1 minus and PC2 plus direction, indicating that they contribute to separate week 1 samples in the PC1 minus and PC2 plus direction. The lower panel shows the plot of elements that contribute to the PC1 minus and PC2 minus direction, indicating that they contribute to separate week 3 samples in the PC1 minus and PC2 minus direction in the PCA score plot. Panel c indicates the loading plot of the microbial consortia data. The upper panel displays the plot of OTUs that contribute to the PC1 minus and PC2 plus direction, indicating that they contribute to separate week 1 samples in the PCA score plot. The lower panel shows the plot of the OTUs that contribute to the PC1 minus and PC2

minus direction, indicating that they contribute to separate week 3 samples in the PCA score plot.

The PCA results from both datasets of elements and microbes showed candidate microbes in the “cesium-philic” and “lanthanide-philic” biofilms on the loading plots because those plots were placed in same loading direction, e.g., PC1 negative – PC2 positive (Cs cluster) or PC1 negative – PC2 negative (Lanth cluster) (Fig. 5c, Additional file 4 and 5: Supplementary Table 4 and 5). Indeed, the HCA heat map of the microbial consortia showed that the PC1 negative – PC2 negative-directed microbes mainly appeared in the week 1 column (Fig. 6 blue dots). The same tendency was observed with the Lanth cluster microbes (Fig. 6 green dots). These results suggest that these two OTU sets are positively correlated with the Lanth cluster (week 3 sample) and Cs cluster (week 1 sample). The correlation heat map chart between the element dataset and the OTU dataset supports this result

Figure 6

Heatmap chart of microbial consortia data for biofilms with a hierarchical clustering

444 analysis (HCA).

445 The heatmap chart has been sorted by the HCA for both axes (OTU axis and sample axis).

446 Green and blue dots indicate contributing OTUs for the PC1 minus and PC2 plus direction

447 and the PC1/PC2 minus direction, respectively. The relative intensity value has been scaled

448 and centered in the row direction.

449

450 The radiocesium and Cs cluster elements are positively correlated to other multicellular

451 eukaryotes, such as *Hexacorallia* and *Oligochaete*. For bacteria, high relative intensities of

452 *Bacteroidetes*, *Rhodobacteraceae* and Gamma-proteobacteria were observed (Additoinal file

453 6: Supplementary Table 6 and Fig. 6). Although a primer set that did not target Archaea

454 was used, Archeal sequences were obtained in this work by sequencing amplicons generated

455 by the 16S ribosomal RNA primers set. An uncultured Crenarcheota in marine group I was

456 observed to be one of the dominant OTUs from the biofilm sample of week 1 (Additional file

457 6: Supplementary Table 6).

458 The function of these microorganisms is poorly understood. However, Alpha- and

459 Gamma-proteobacteria have been obtained from biofilms on the surface of nuclear fuel pools

[21]. According to Sarro et al. [21], biofilms obtained from nuclear fuel pools accumulate  $^{60}\text{Co}$ . Cobalt accumulation in the week 1 sample was suggested by the PCA (Fig. 5b and Additional file 4: Supplementary Table 4) despite a lack of  $^{60}\text{Co}$  signal indicated by gamma-ray spectrography. The microbial community retrieved from the nuclear fuel pool was described as capable of accumulating both  $^{60}\text{Co}$  and  $^{137}\text{Cs}$  as reported by Tisakova et al. [22]. Our results suggest that the biofilm sampled in week 1 presents similar characteristics to the microbes described by Sarro et al. and Tisakova et al.

## Conclusions

In this study, we found heterogeneous distributions of radiocesium and radiosilver among a variety of sample types from the coastal environment near the FDNPP disaster. Specific organisms that use hemocyanin, such as shell fish and Ascidians, accumulate and retain  $^{110\text{m}}\text{Ag}$ , and similar observations have been reported in terrestrial spiders. We also found radiosilver in the sediment samples, suggesting that particular materials can be sources of radiosilver for these organisms, even if particles filtered from the water have low levels of radioactivity in our samples.

However, the biofilm samples did not display detectable signals of radiosilver, although the amount of radiocesium in these samples was higher than that found in other marine organisms. Biofilms may still act as an entry point for radiocesium to enter into the ecosystem. In this paper, we could not assess the functional mechanisms by which biofilms accumulate cesium specifically; thus, future research that includes cultivation experiments and meta-transcriptome analyses should be performed to further investigate the microbial communities described in this work and provide insights into this complex topic.

## Declarations

## Author's contributions

SM, HO and JS designed research. SM, HO, KK, HY and JS performed sampling. YK and MI performed ICP-MS analysis and KS and JK partially performed sample preparation for ICP-MS and advice for statistical analysis. Sample preparation and molecular biological experiment was performed by SM and KK. Radioactivity measurement has been done by HO. SCUBA diving safety control and sampling arrangement has been done by HY and JS.



## 492 Acknowledgements

493 Sampling was permitted by the Iwaki City Fishery Association and performed via the  
494 fishing vessel Shyo-ei-maru and crew, which belong to the abalone section of the Iwaki  
495 Fishery Association. The diving safety of SM was overseen by Toshiyuki Suzuki. The  
496 authors wish to acknowledge the profound academic comments and proofreading provided  
497 by R. Craig Everroad and Diogo M. O. Ogawa.

498

## 499 Competing interests

500 The authors declare no competing financial interests.

501

## 502 Availability of data and materials

503 The datasets used and/or analysed during the current study except for ribosomal RNA  
504 sequences data and datasets that showed in manuscript or supplementary tables are  
505 available from the corresponding author on reasonable request.

506 Ribosomal RNA dataset are available in the DDBJ sequence read archive with accession

507 number DRA004367.

508 Electronic supplementary material

509

510 Additional file 1: Supplementary Table 1: Radio activity of core samples. (XLSX 44 KB)

511

512 Additional file 2: Supplementary Table 2: Radio activity of macro algae samples. (XLSX 47

513 KB)

514

515 Additional file 3: Supplementary Table 3: Radio activity of macro benthos samples. (XLSX

516 46 KB)

517

518 Additional file 4: Supplementary Table 4: Loading plot on PC1 minus - PC2 plus. (XLSX 52

519 KB)

520

521 Additional file 5: Supplementary Table 5: oading plot results of PC1 minus - PC2 minus.

522 (XLSX 51 KB)

523

524 Additional file 6: Supplementary Table 6: Cs cluster taxon in Week1 sample. (XLSX 30 KB)

525

526 Funding

527 This work was supported by RIKEN Incentive Research Project (FY2011) "Emergency

528 monitoring for possible cycling of radio active compounds via oceanic food web" (SM, HO)

529 and biofilm section was supported by MEXT Grant-in-Aid for Scientific Research on

530 Innovative Areas Grant Number 23117003 (SM, KK).

531

532 References

533 1. Kanda J. Long-term Sources: To what extent are marine sediments, coastal groundwater,

534 and rivers a source of ongoing contamination? The Accidents at Fukushima Dai-Ichi,

535 Exploring the Impacts of Radiation on the Ocean. Tokyo; 2012. pp. 1–19. Available from:

536 <http://www.whoiedu/fileservier.do?id=138584&pt=2&p=141569>

537 2. Wada T, Nemoto Y, Shimamura S, Fujita T, Mizuno T, Sohtome T, et al. Effects of the

538 nuclear disaster on marine products in Fukushima. Journal of Environmental Radioactivity.

539 Elsevier Ltd; 2013;124:246–254.

- 540 3. Nakashima H, Mori A, Takeda K, Tanaka H, Kobayashi N, Tanoi K, et al. Discovery of  
541 radioactive silver ( $^{110m}\text{Ag}$ ) in spiders and other fauna in the terrestrial environment after the  
542 meltdown of Fukushima Dai-ichi nuclear power plant. Proceedings of the Japan Academy.  
543 Ser. B: Physical and Biological Sciences. 2015;91:160–174.
- 544 4. Haba H, Kanaya J, Mukai H, Kambara T, Kase M. One-year monitoring of airborne  
545 radionuclides in Wako, Japan, after the Fukushima Dai-ichi nuclear power plant accident in  
546 2011. *Geochem. J.* 2012;46:271–278.
- 547 5. Agostinelli S, Allison J, Amako K, Apostolakis J, Araujo H, Arce P, et al. Geant4—a  
548 simulation toolkit. *Nuclear Instruments and Methods in Physics Research Section A:*  
549 *Accelerators, Spectrometers, Detectors and Associated Equipment.* 2003;506:250–303.
- 550 6. Allison J, Amako K, Apostolakis J. IEEE Xplore Abstract - Geant4 developments and  
551 applications. *Nuclear Science.* 2006;53:270-278.
- 552 7. Hirayama H, Namito Y, Nelson WR, Bielajew AF, Wilderman SJ, Michigan U. The EGS5  
553 code system. United States. Department of Energy. 2005;No. SLAC-R-730.

554 8. Itouga M, Kato Y, Sakakibara H. Phenotypic plasticity and mineral nutrient uptake of  
555 the moss *Polytrichum commune* Hedw. (Polytrichaceae, Bryophyta) during acclimation to a  
556 change in light intensity. *Hikobia*. 2014;16:459–466.

557 9. Caporaso JG, Lauber CL, Walters WA, Berg-Lyons D, Lozupone CA, Turnbaugh PJ, et al.  
558 Global patterns of 16S rRNA diversity at a depth of millions of sequences per sample.  
559 *Proceedings of the National Academy of Sciences*. 2011;108 Suppl 1:4516–4522.

560 10. Caporaso JG, Lauber CL, Walters WA, Berg-Lyons D, Huntley J, Fierer N, et al.  
561 Ultra-high-throughput microbial community analysis on the Illumina HiSeq and MiSeq  
562 platforms. *ISME J*. 2012;6:1621–1624.

563 11. Stoeck T, Bass D, Nebel M, Christen R, Jones MDM, Breiner H-W, et al. Multiple  
564 marker parallel tag environmental DNA sequencing reveals a highly complex eukaryotic  
565 community in marine anoxic water. *Mol Ecol*. 2010;19 Suppl 1:21–31.

566 12. Caporaso JG, Kuczynski J, Stombaugh J, Bittinger K, Bushman FD, Costello EK, et al.  
567 QIIME allows analysis of high-throughput community sequencing data. *Nat. Methods*.  
568 2010;7:335–336.

- 569 13. Team RC. R: A language and environment for statistical computing [Internet]. R  
570 Foundation for Statistical Computing, editor. www.R-project.org. Vienna, Austria; 2014  
571 [cited 2016 May 24]. Available from: <http://www.R-project.org/>
- 572 14. Zhao X, Valen E, Parker BJ, Sandelin A. Systematic clustering of transcription start site  
573 landscapes. PLoS ONE. 2011;6:e23409.
- 574 15. Buesseler KO, Jayne SR, Fisher NS, Rypina II, Baumann H, Baumann Z, et al.  
575 Fukushima-derived radionuclides in the ocean and biota off Japan. Proceedings of the  
576 National Academy of Sciences. 2012;109:5984–5988.
- 577 16. van Holde KE, Miller KI, Lang WH. Molluscan Hemocyanins: Structure and Function.  
578 Blood and tissue oxygen carriers. Berlin, Heidelberg: Springer Berlin Heidelberg; 1992. pp.  
579 257–300.
- 580 17. Ueki T, Michibata H. Molecular mechanism of the transport and reduction pathway of  
581 vanadium in ascidians. Coordination Chemistry Reviews. Elsevier B.V; 2011;255:2249–  
582 2257.

583 18. Michibata H, Terada T, Anada N, Yamakawa K. The accumulation and distribution of  
584 vanadium, iron, and manganese in some solitary ascidians. The Biological Bulletin.  
585 1986;171:672-681.

586 19. Genta-Jouve GG, Cachet N, Oberhänsli F, Noyer C, Teyssié J-L, Thomas OP, et al.  
587 Comparative bioaccumulation kinetics of trace elements in Mediterranean marine sponges.  
588 Chemosphere. Elsevier Ltd; 2012;89:340–349.

589 20. Berthet B, Mouneyrac C, Pérez T, Amiard-Triquet C. Metallothionein concentration in  
590 sponges (*Spongia officinalis*) as a biomarker of metal contamination. Comparative  
591 Biochemistry and Physiology Part C: Toxicology & Pharmacology. 2005;141:306–313.

592 21. Sarró MI, García AM, Moreno DA. Biofilm formation in spent nuclear fuel pools and  
593 bioremediation of radioactive water. Int. Microbiol. 2005;8:223–230.

594 22. Tišáková L, Pipíška M, Godány A, Horník M, Vidová B, Augustín J. Bioaccumulation of  
595 <sup>137</sup>Cs and <sup>60</sup>Co by bacteria isolated from spent nuclear fuel pools. J Radioanal Nucl Chem.  
596 2012;295:737–748.

597

Fig.1

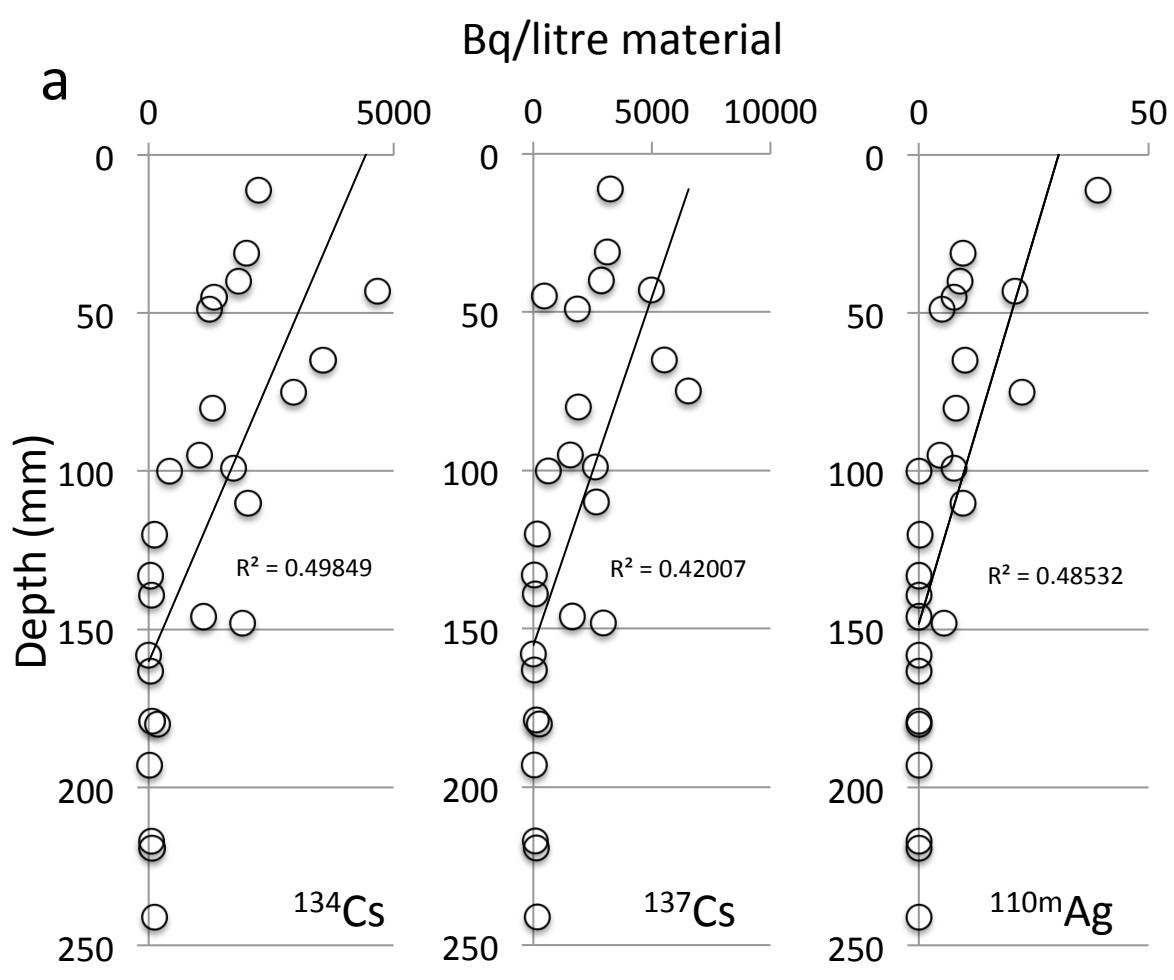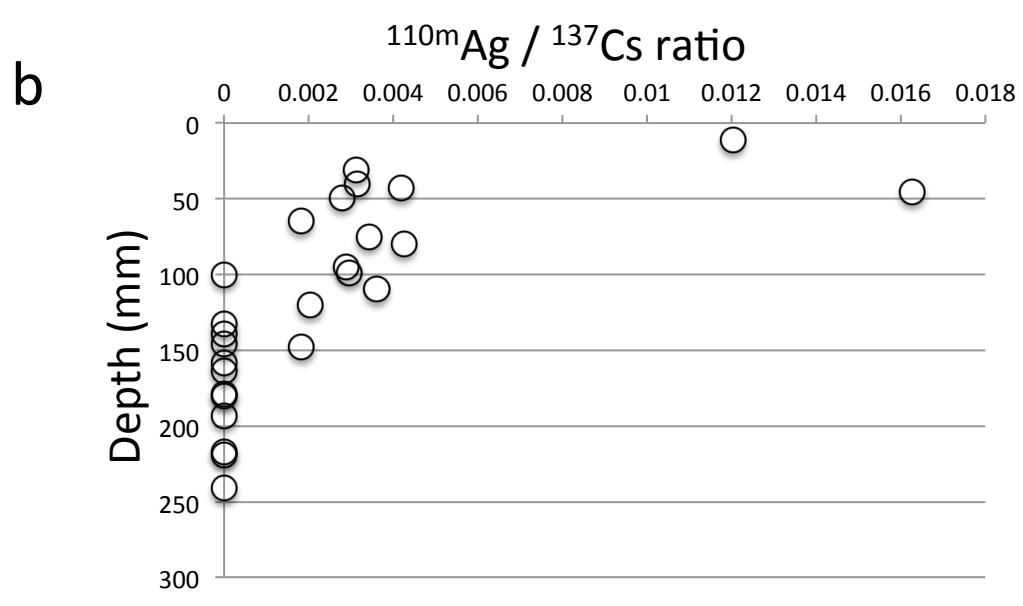



Fig.2

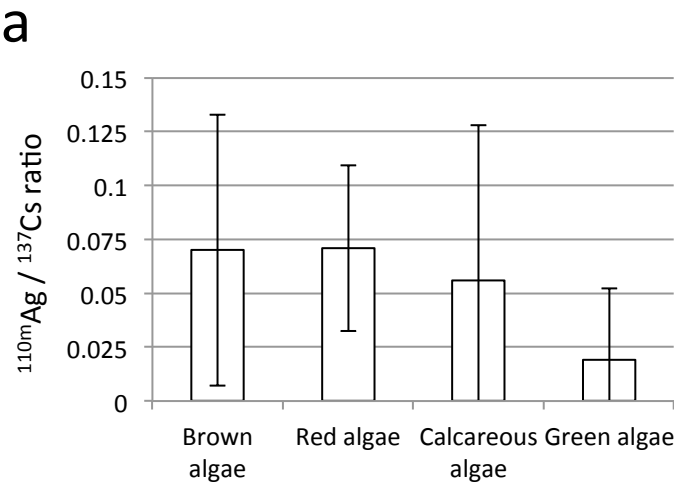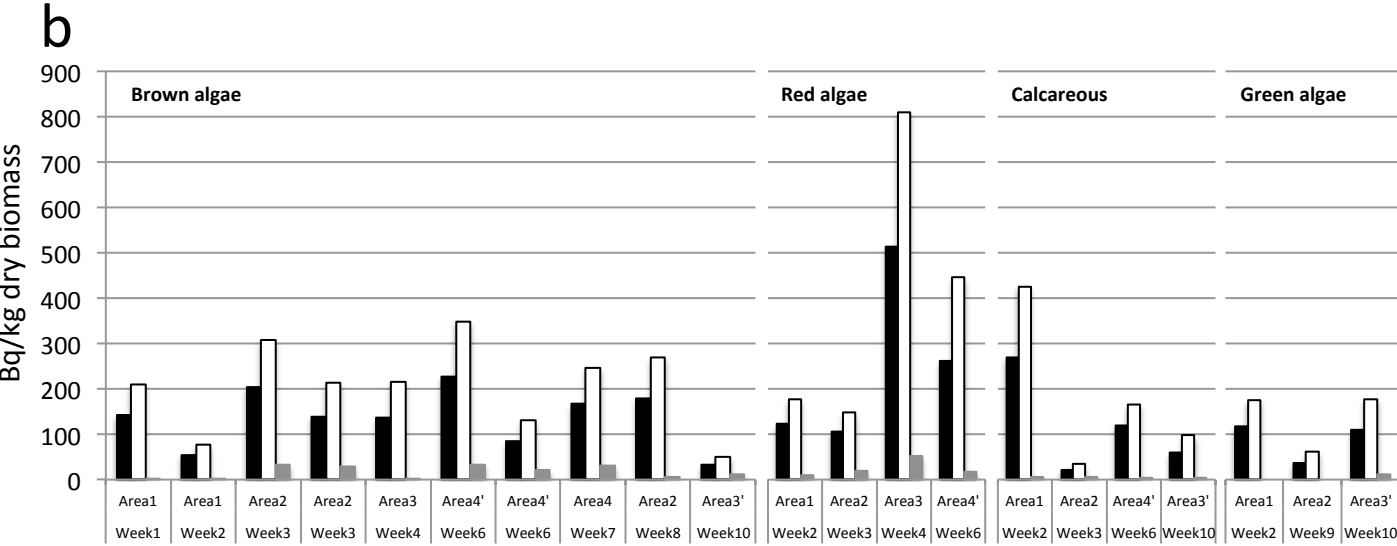

Fig.3

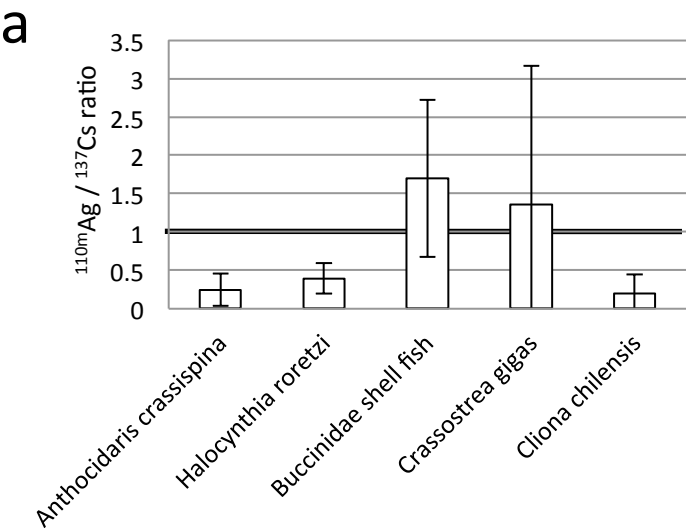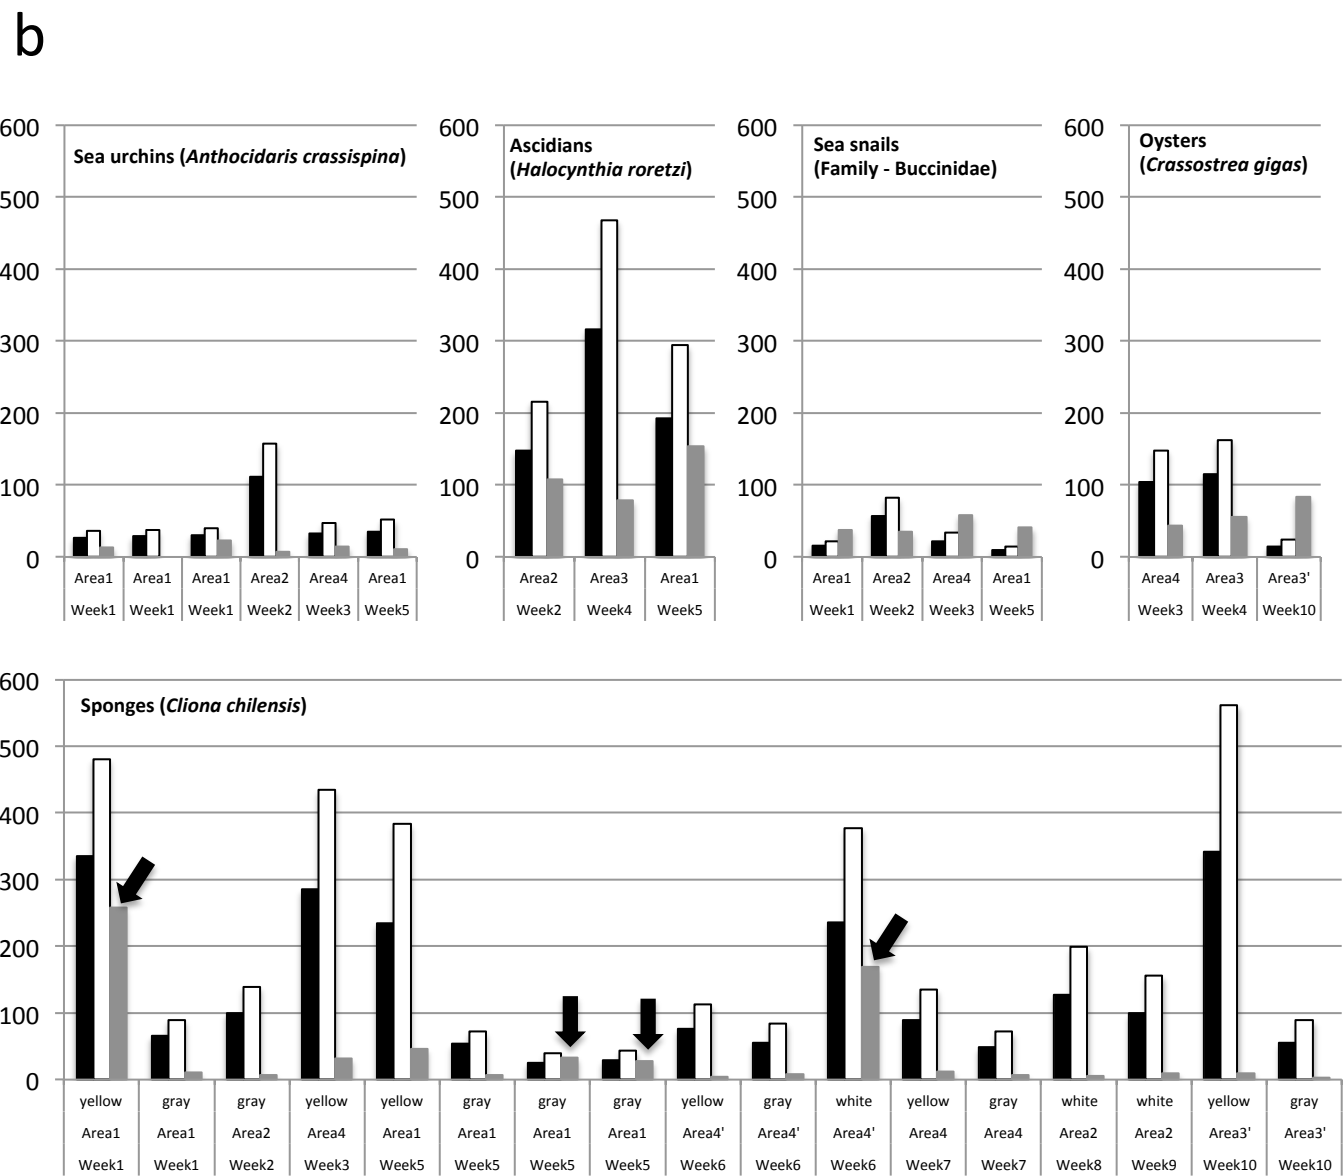

Fig.4

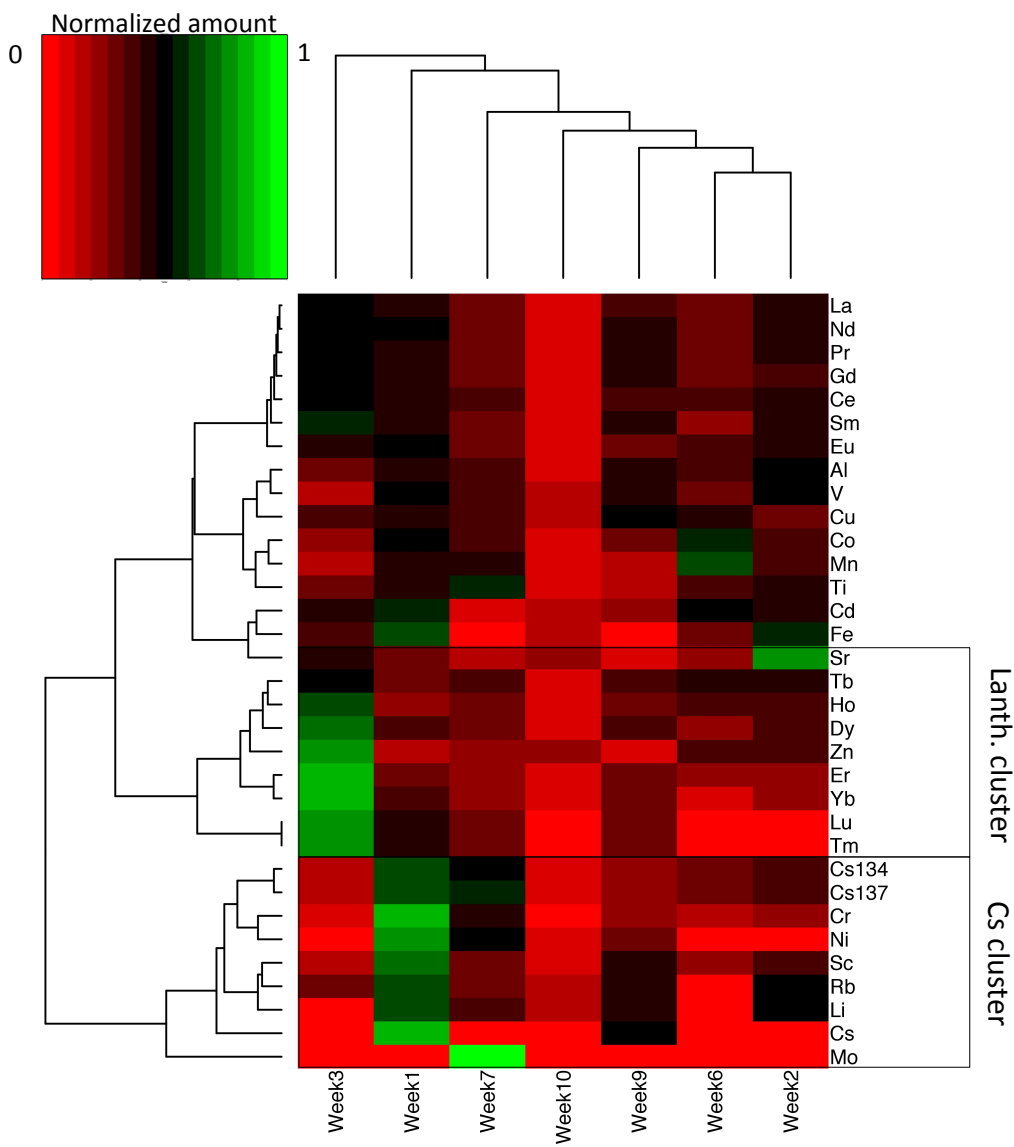

Fig.5

a

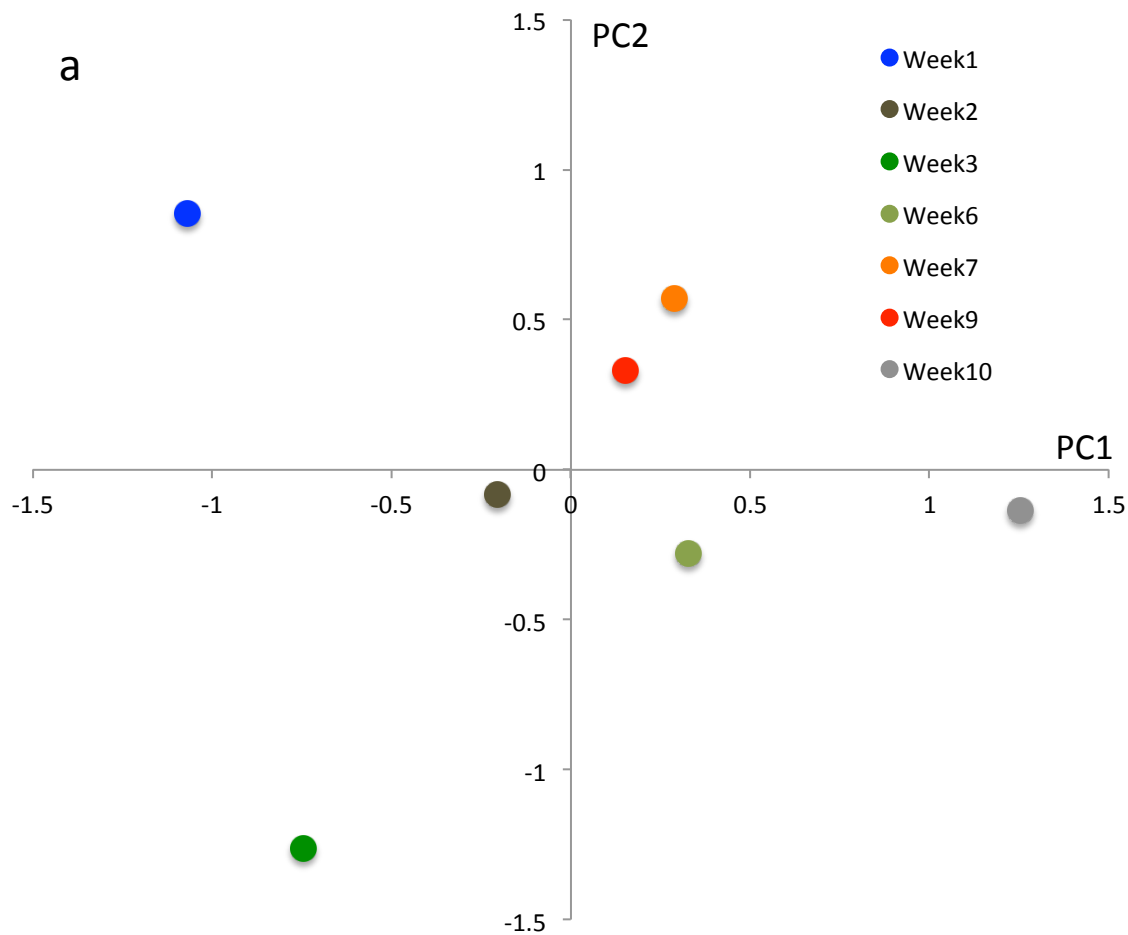

b

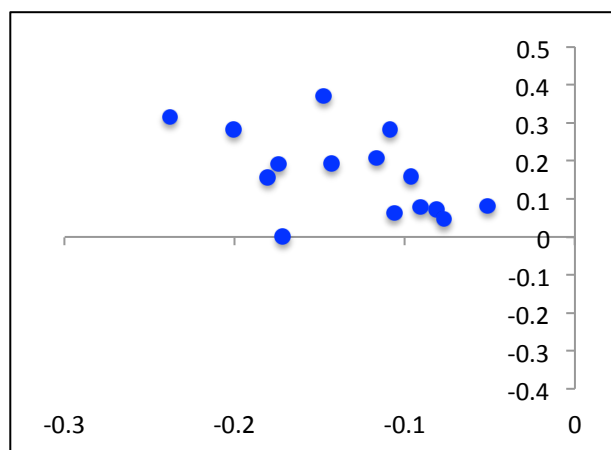

c

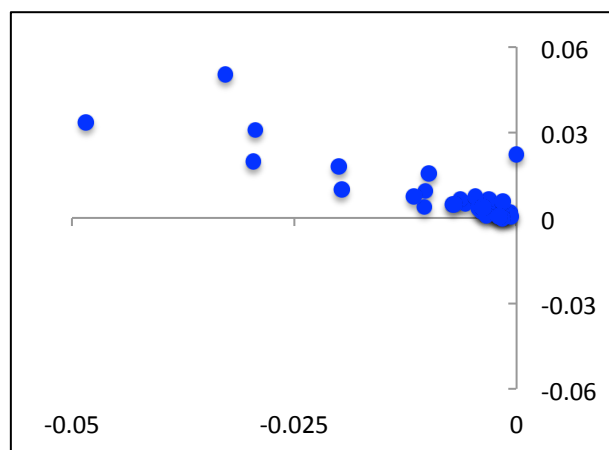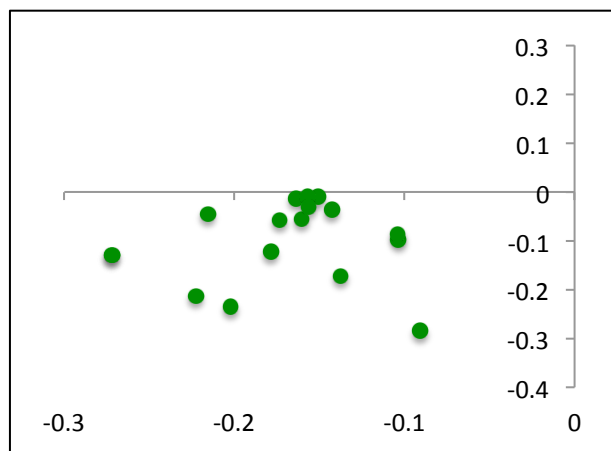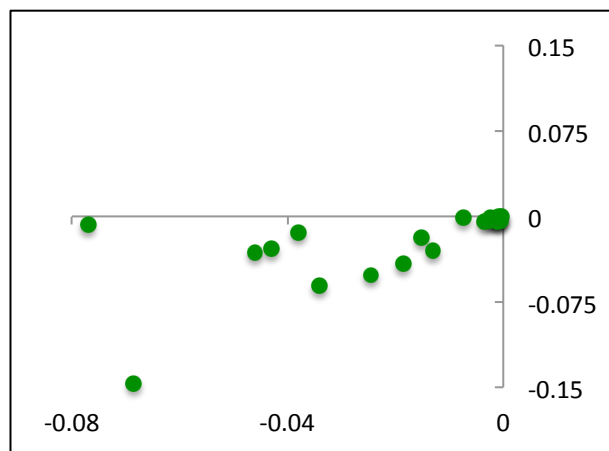

Fig.6

Row direction scaled and centered

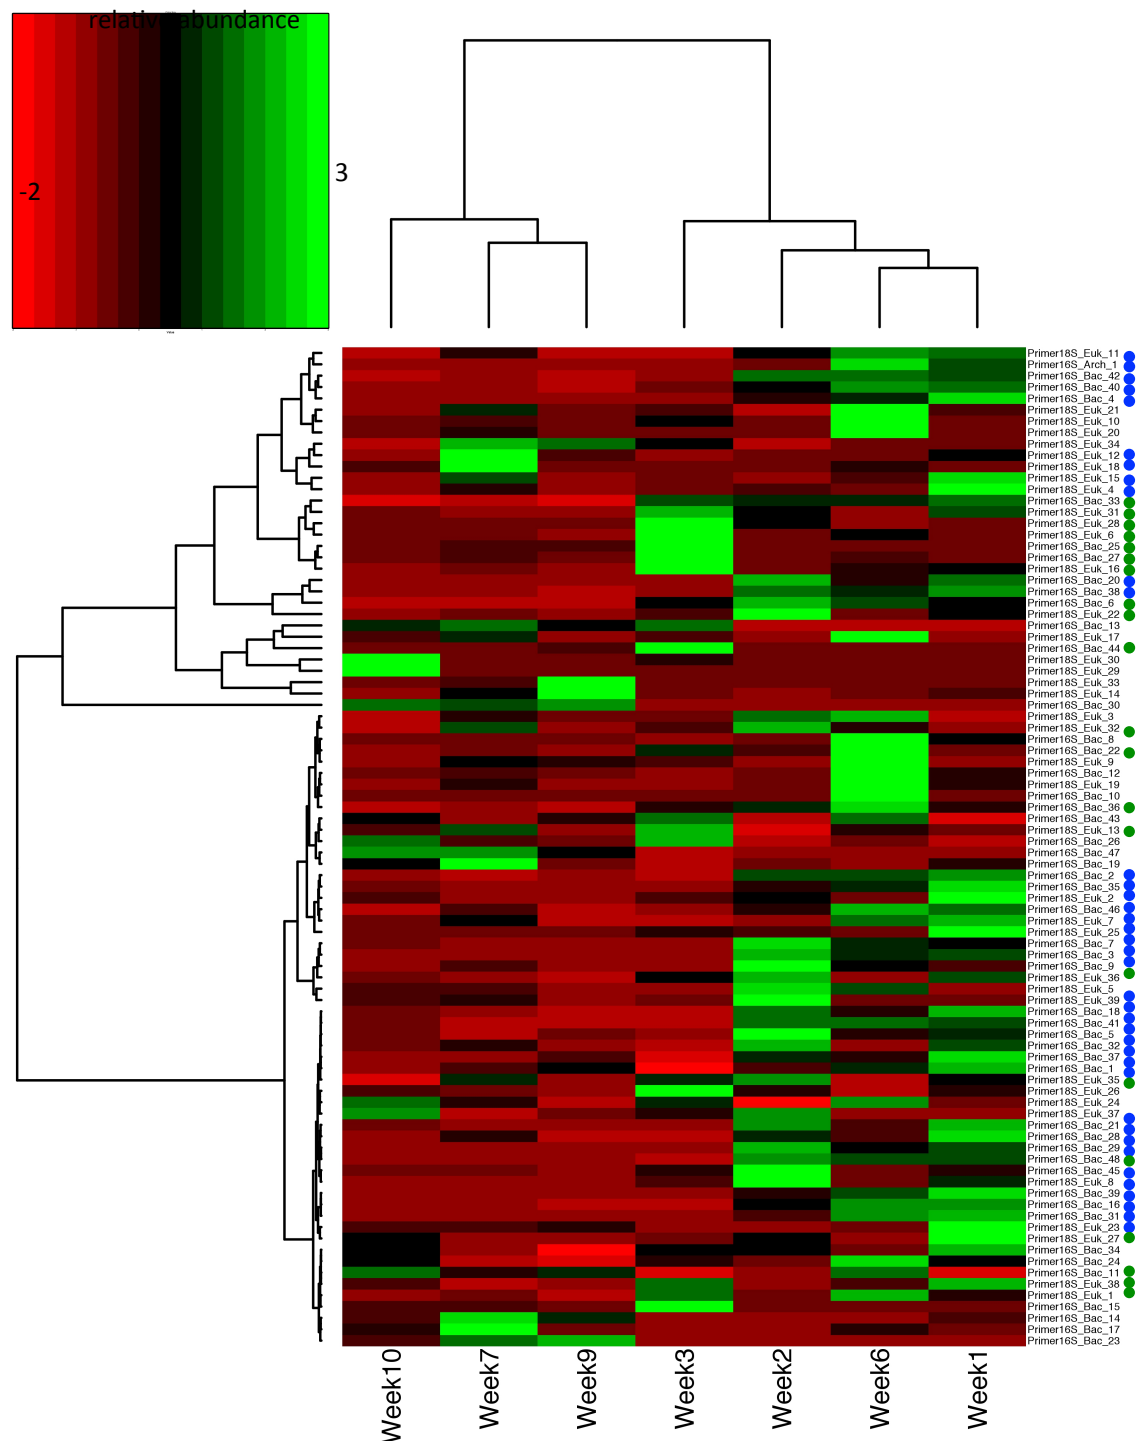

Source: http://www.biorxiv.org/content/10.1101/106211v1.full.pdf
